# Supplementary material
Source: Royal Society of Chemistry journal article supplement (doi:10.1039/d6cp01459c)
Supplement: d6cp01459c1.pdf [file d6cp01459c1.pdf]

### Supplementary Information

Electronic structures of crystalline phases in poly(vinylidene fluoride) films probed by far- and deep-ultraviolet spectroscopy and quantum chemical calculations

Yumeka Ono, Nami Ueno\* and Ichiro Tanabe\*

Department of Chemistry, College of Science, Rikkyo University, 3-34-1 Nishi-Ikebukuro, Toshima,  
Tokyo 171-8501, Japan

\* E-mail: [itanabe@rikkyo.ac.jp](mailto:itanabe@rikkyo.ac.jp)

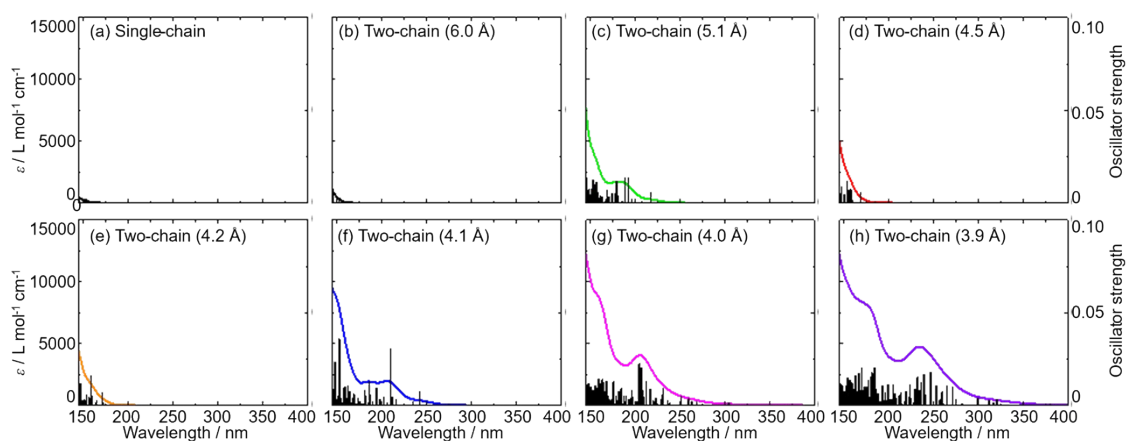

**Fig. S1** TD-DFT-calculated oscillator strengths and molar extinction coefficients ( $\epsilon$ ) of (a) single-chain  $\beta$  phase and (b–h) two-chain  $\beta$  phase with the interchain distance varying from 6.0 to 3.9 Å.

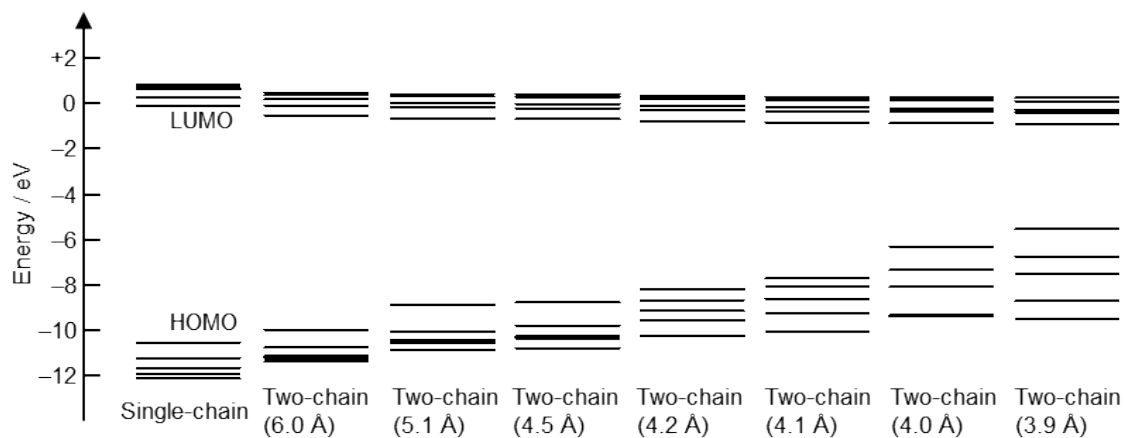

**Fig. S2** Energy level diagrams from HOMO-4 to LUMO+4 of single-chain  $\beta$  phase and two-chain  $\beta$  phase with the interchain distance varying from 6.0 to 3.9 Å.

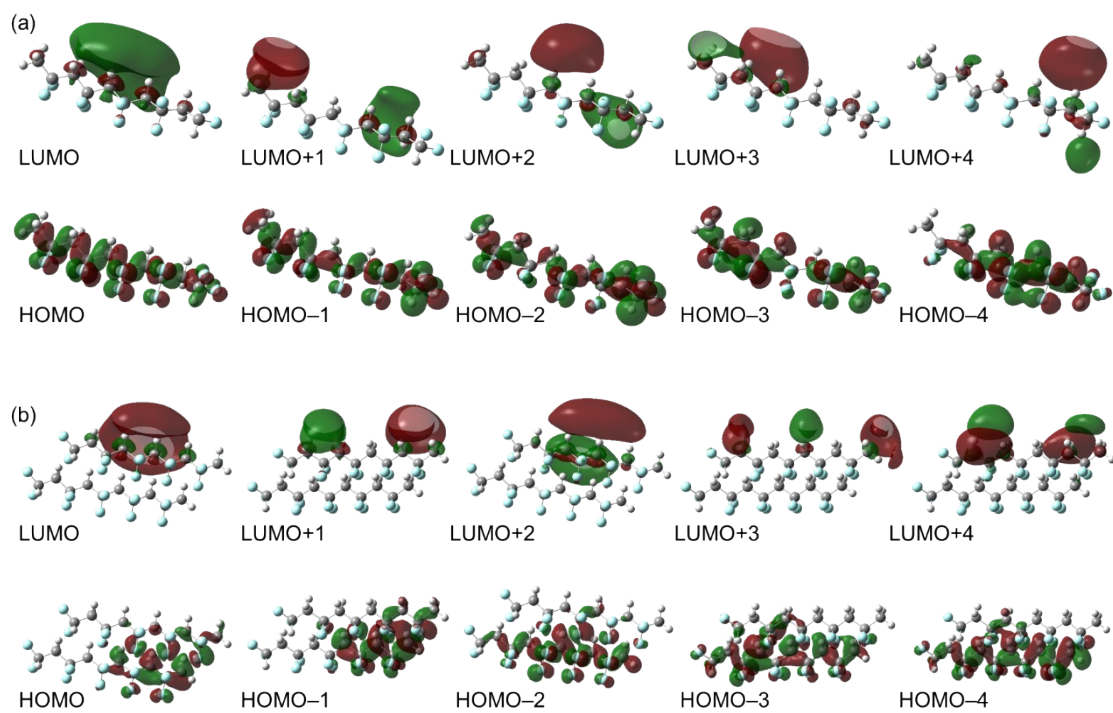

**Fig. S3** Calculated molecular orbitals from HOMO-4 to LUMO+4 for (a) single-chain  $\beta$  phase and (b) two-chain  $\beta$  phase with an interchain distance of 4.0 Å.

**Table S1** Main transition energies, oscillator strengths, and major electronic configurations (initial/final orbitals and their expansion coefficients) of (a) single-chain  $\beta$  phase and (b–h) two-chain  $\beta$  phase with the interchain distance varying from 6.0 to 3.9 Å.

(a) Single-chain  $\beta$  phase

| Wavelength/nm | Energy/eV | Oscillator strength | Initial orbital | Final orbital | Coefficient |
|---------------|-----------|---------------------|-----------------|---------------|-------------|
| 153.3         | 8.09      | 0.0021              | HOMO            | LUMO          | 0.643       |

(b) Two-chain  $\beta$  phase with an interchain distance of 6.0 Å

| Wavelength/nm | Energy/eV | Oscillator strength | Initial orbital | Final orbital | Coefficient |
|---------------|-----------|---------------------|-----------------|---------------|-------------|
| 152.5         | 8.13      | 0.0011              | HOMO            | LUMO          | 0.575       |
| 150.3         | 8.25      | 0.0027              | HOMO–2          | LUMO          | 0.625       |

(c) Two-chain  $\beta$  phase with an interchain distance of 5.1 Å

| Wavelength/nm | Energy/eV | Oscillator strength | Initial orbital | Final orbital | Coefficient |
|---------------|-----------|---------------------|-----------------|---------------|-------------|
| 168.0         | 7.38      | 0.0057              | HOMO            | LUMO+1        | 0.570       |
| 158.3         | 7.83      | 0.0065              | HOMO–2          | LUMO          | 0.320       |
| 156.9         | 7.90      | 0.0074              | HOMO–1          | LUMO          | 0.273       |
| 155.1         | 7.99      | 0.0070              | HOMO            | LUMO+4        | 0.454       |
| 153.2         | 8.09      | 0.0113              | HOMO            | LUMO+2        | 0.405       |

(d) Two-chain  $\beta$  phase with an interchain distance of 4.5 Å

| Wavelength/nm | Energy/eV | Oscillator strength | Initial orbital | Final orbital | Coefficient |
|---------------|-----------|---------------------|-----------------|---------------|-------------|
| 171.1         | 7.24      | 0.0065              | HOMO            | LUMO+2        | 0.416       |
| 160.3         | 7.73      | 0.0051              | HOMO–2          | LUMO          | 0.379       |
| 159.2         | 7.79      | 0.0158              | HOMO            | LUMO+5        | 0.352       |
| 156.5         | 7.92      | 0.0045              | HOMO            | LUMO+4        | 0.460       |
| 154.2         | 8.04      | 0.0053              | HOMO–3          | LUMO+1        | 0.287       |

(e) Two-chain  $\beta$  phase with an interchain distance of 4.2 Å

| Wavelength/n<br>m | Energy/e<br>V | Oscillator strength | Initial orbital | Final orbital | Coefficien<br>t |
|-------------------|---------------|---------------------|-----------------|---------------|-----------------|
| 192.4             | 6.44          | 0.0137              | HOMO            | LUMO+2        | 0.537           |
| 188.8             | 6.57          | 0.0137              | HOMO-2          | LUMO          | 0.458           |
| 179.1             | 6.92          | 0.0118              | HOMO-3          | LUMO          | 0.460           |
| 156.6             | 7.92          | 0.0111              | HOMO-1          | LUMO+9        | 0.231           |
| 153.7             | 8.06          | 0.0102              | HOMO-3          | LUMO+2        | 0.212           |

(f) Two-chain  $\beta$  phase with an interchain distance of 4.1 Å

| Wavelength/n<br>m | Energy/e<br>V | Oscillator strength | Initial orbital | Final orbital | Coefficien<br>t |
|-------------------|---------------|---------------------|-----------------|---------------|-----------------|
| 209.8             | 5.91          | 0.0302              | HOMO            | LUMO+2        | 0.377           |
| 186.6             | 6.64          | 0.0126              | HOMO-2          | LUMO+2        | 0.371           |
| 162.6             | 7.63          | 0.0102              | HOMO-1          | LUMO+11       | 0.269           |
| 153.1             | 8.10          | 0.0357              | HOMO-3          | LUMO+4        | 0.202           |
| 152.8             | 8.11          | 0.0114              | HOMO-1          | LUMO+14       | 0.175           |

(g) Two-chain  $\beta$  phase with an interchain distance of 4.0 Å

| Wavelength/n<br>m | Energy/e<br>V | Oscillator strength | Initial orbital | Final orbital | Coefficien<br>t |
|-------------------|---------------|---------------------|-----------------|---------------|-----------------|
| 206.6             | 6.00          | 0.0204              | HOMO            | LUMO+17       | 0.251           |
| 204.4             | 6.07          | 0.0223              | HOMO-2          | LUMO+2        | 0.407           |
| 163.2             | 7.60          | 0.0140              | HOMO            | LUMO+47       | 0.177           |
| 161.9             | 7.66          | 0.0133              | HOMO-5          | LUMO          | 0.331           |
| 158.8             | 7.81          | 0.0139              | HOMO            | LUMO+17       | 0.216           |

(h) Two-chain  $\beta$  phase with an interchain distance of 3.9 Å

| Wavelength/n<br>m | Energy/e<br>V | Oscillator strength | Initial orbital | Final orbital | Coefficien<br>t |
|-------------------|---------------|---------------------|-----------------|---------------|-----------------|
|-------------------|---------------|---------------------|-----------------|---------------|-----------------|

---

|       |      |        |        |         |       |
|-------|------|--------|--------|---------|-------|
| 246.4 | 5.03 | 0.0176 | HOMO   | LUMO+14 | 0.275 |
| 239.7 | 5.17 | 0.0165 | HOMO   | LUMO+31 | 0.212 |
| 183.7 | 6.75 | 0.0204 | HOMO-4 | LUMO    | 0.272 |
| 181.3 | 6.84 | 0.0174 | HOMO-2 | LUMO+7  | 0.211 |
| 169.7 | 7.31 | 0.0201 | HOMO-1 | LUMO+10 | 0.288 |

---

**Table S2** Calculated orbital energies (eV) of HOMO-4 to LUMO+4 in single-chain  $\beta$  phase and two-chain  $\beta$  phase with the interchain distance varying from 6.0 to 3.9 Å.

|        | Single | 6.0 Å | 5.1 Å | 4.5 Å  | 4.2 Å  | 4.1 Å  | 4.0 Å  | 3.9 Å  |
|--------|--------|-------|-------|--------|--------|--------|--------|--------|
| LUMO+4 | 0.70   | 0.15  | 0.11  | 0.17   | 0.20   | 0.28   | 0.29   | 0.35   |
| LUMO+3 | 0.56   | 0.01  | -0.03 | 0.03   | 0.07   | 0.15   | 0.18   | 0.23   |
| LUMO+2 | 0.48   | -0.35 | -0.39 | -0.30  | -0.25  | -0.14  | -0.13  | 0.07   |
| LUMO+1 | 0.12   | -0.49 | -0.53 | -0.47  | -0.43  | -0.33  | -0.29  | -0.21  |
| LUMO   | -0.23  | -1.00 | -1.04 | -0.96  | -0.92  | -0.81  | -0.79  | -0.65  |
| HOMO   | -10.65 | -6.42 | -5.65 | -7.84  | -8.30  | -8.90  | -8.99  | -10.09 |
| HOMO-1 | -11.33 | -7.46 | -6.85 | -8.17  | -8.78  | -9.90  | -10.17 | -10.86 |
| HOMO-2 | -11.77 | -8.20 | -7.61 | -8.71  | -9.27  | -10.36 | -10.56 | -11.25 |
| HOMO-3 | -12.04 | -9.45 | -8.83 | -9.36  | -9.65  | -10.47 | -10.67 | -11.32 |
| HOMO-4 | -12.25 | -9.51 | -9.61 | -10.15 | -10.35 | -10.90 | -10.96 | -11.49 |
